# Supplementary material
Source: publisher site journal article supplement (http://e-cmh.org/upload/media/cmh-2023-0485-Supplementary-Fig-2.pdf)
Supplement: Supplementary file 1 [file cmh-2023-0485-Supplementary-Fig-2.pdf]

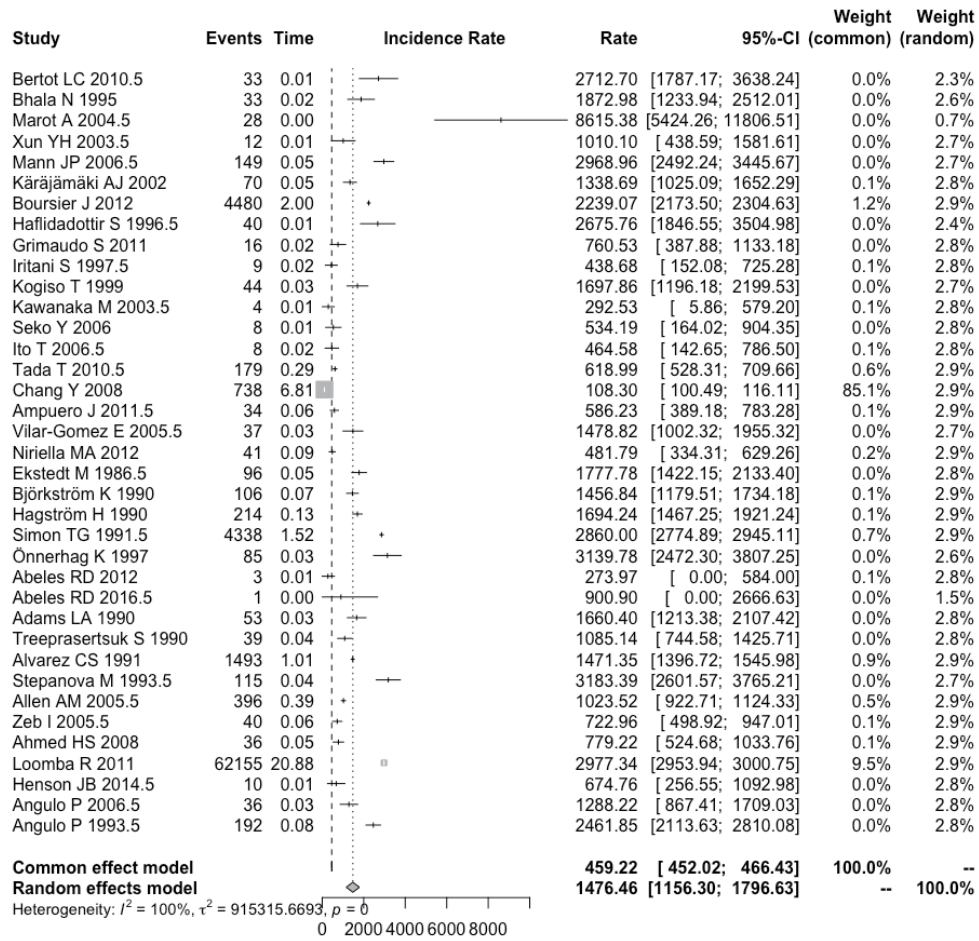

A All-cause mortality

Supplementary Figure 2. Forest plots.

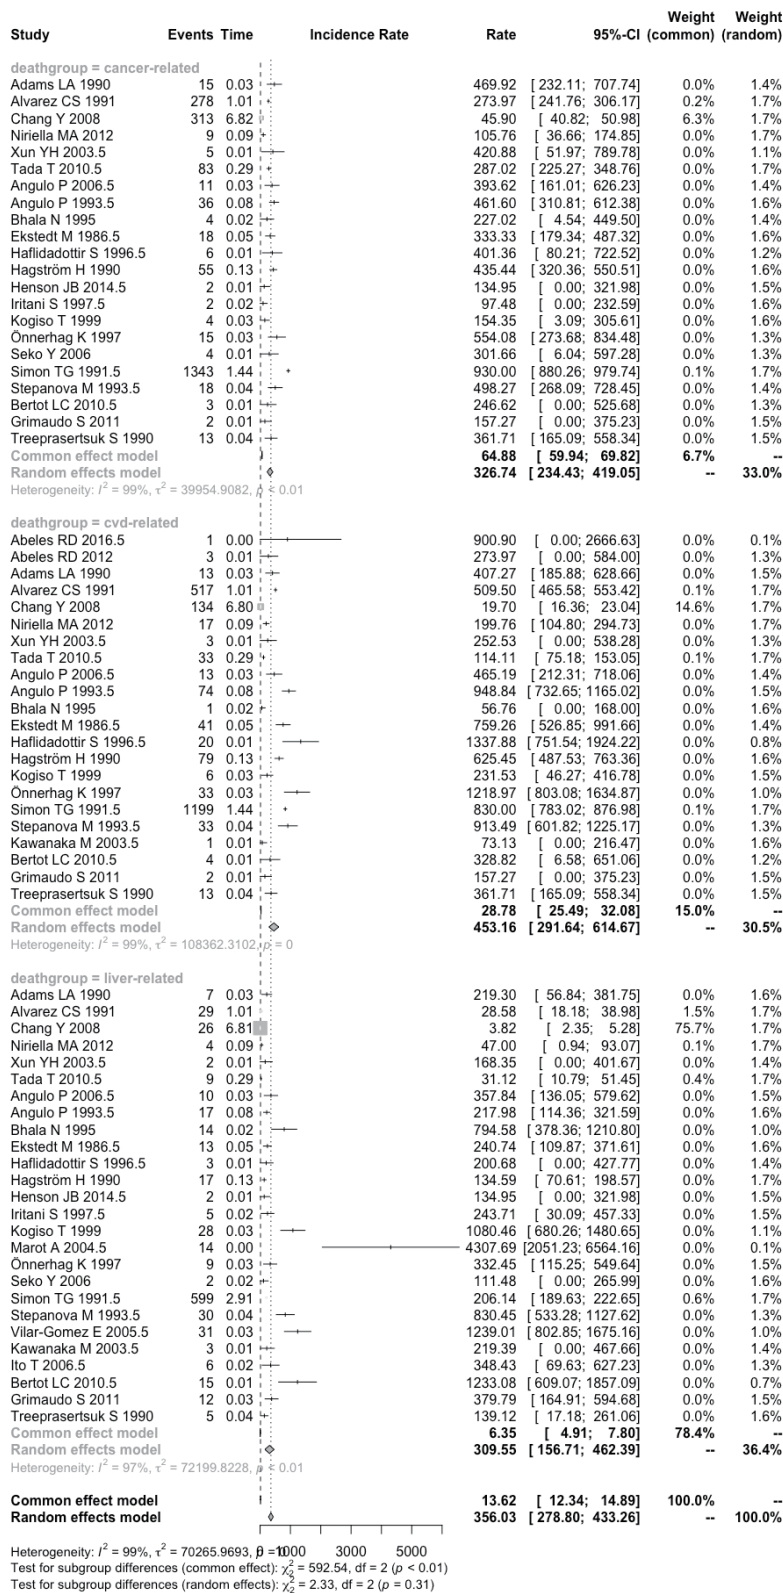

**B** ACause-specific mortalities

Supplementary Figure 2. Continued.

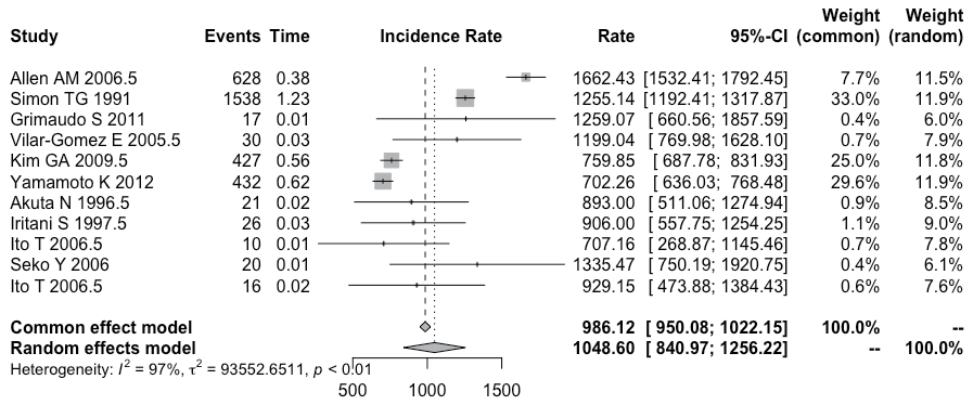

**C** Non-liver cancer events

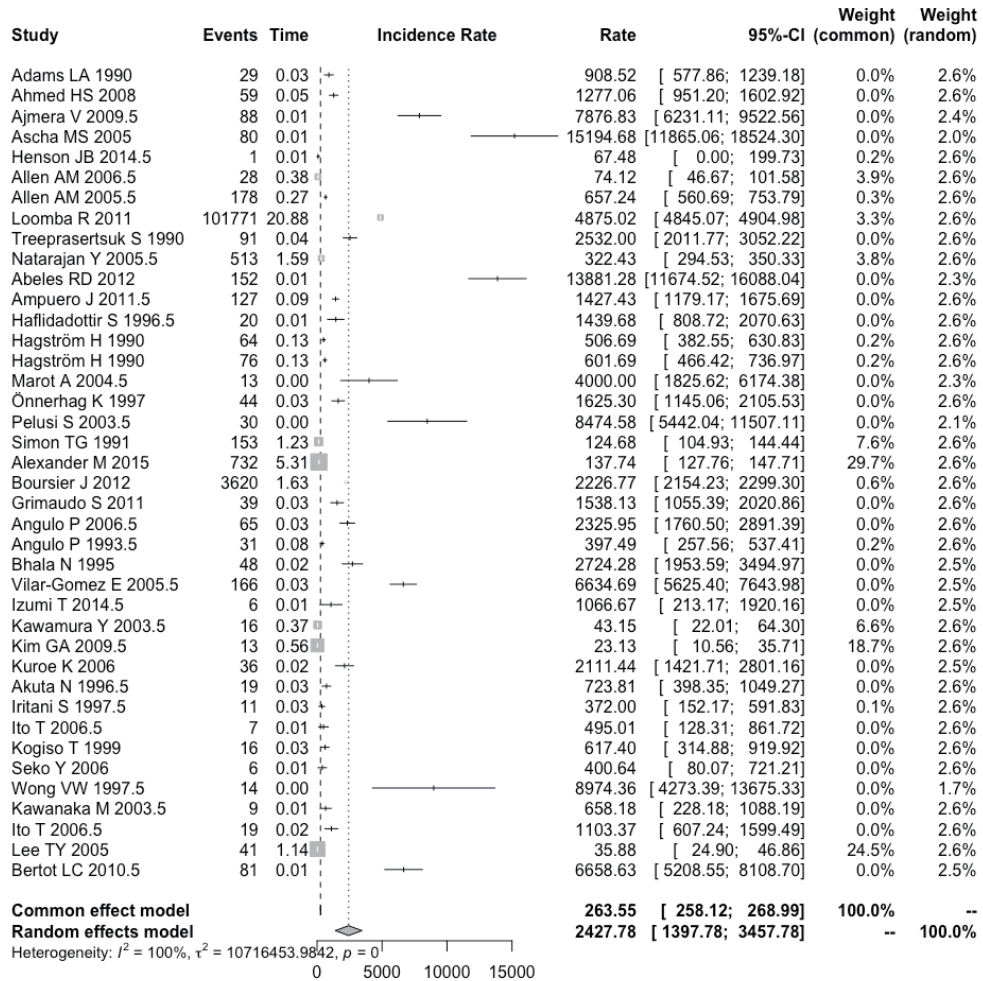

**D** Liver-related events overall

Supplementary Figure 2. Continued.

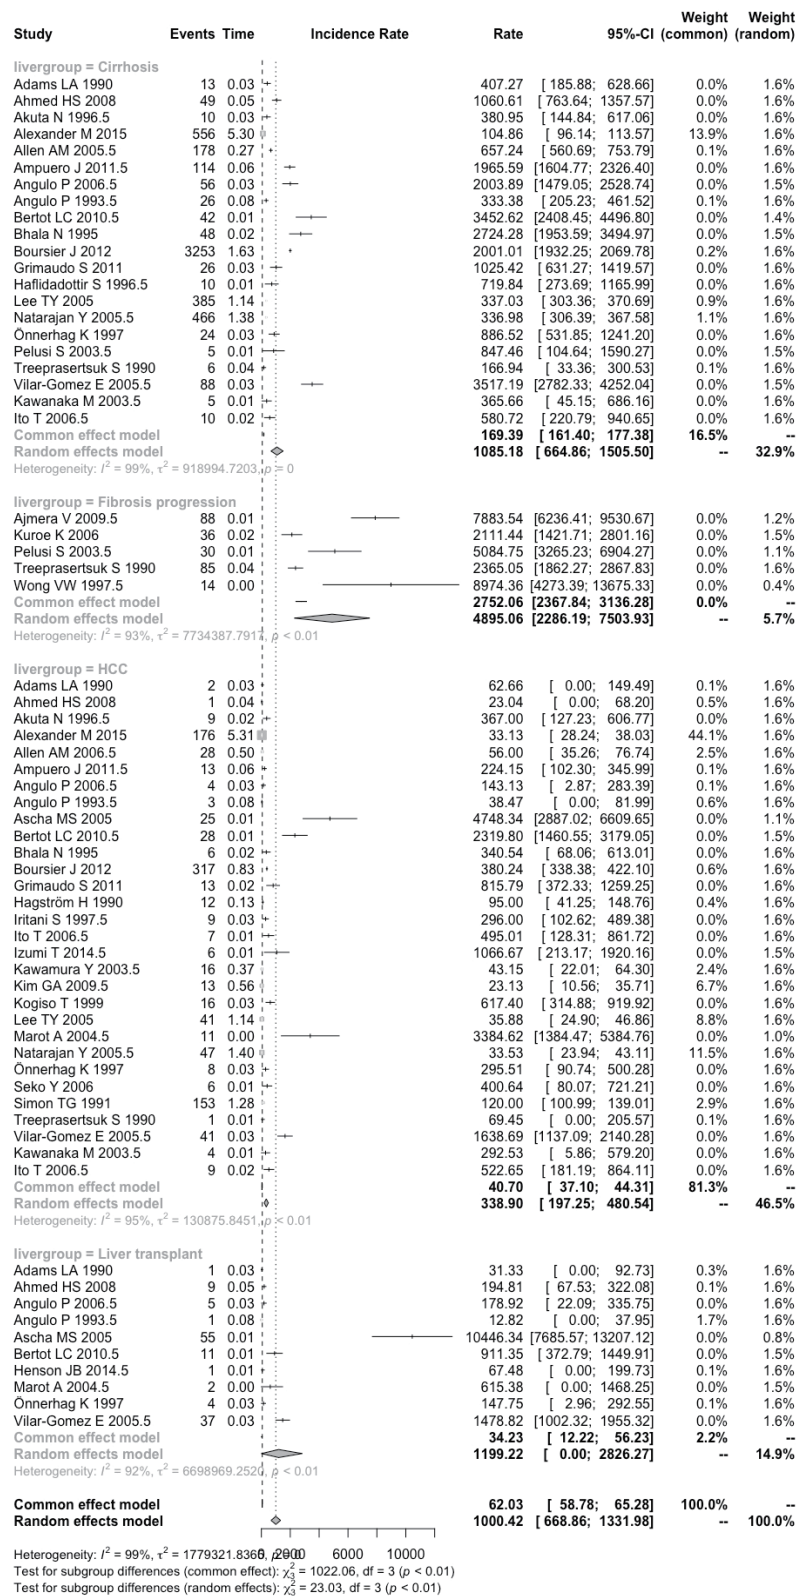

**E** Liver specific events

Supplementary Figure 2. Continued.



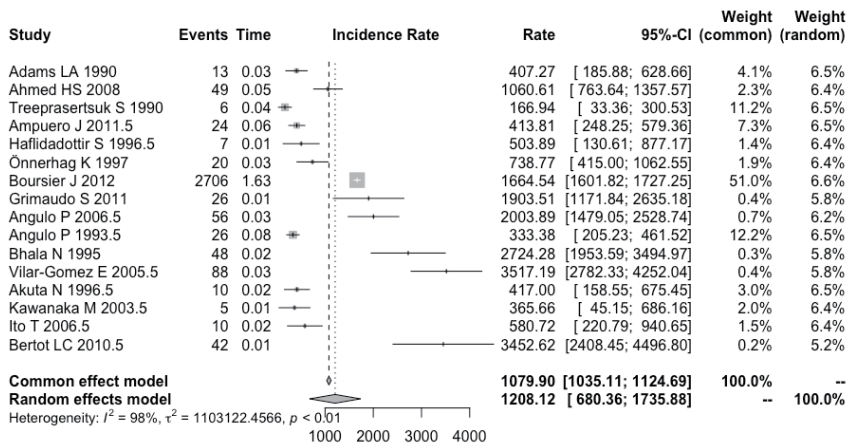

F Decompensated cirrhosis events overall

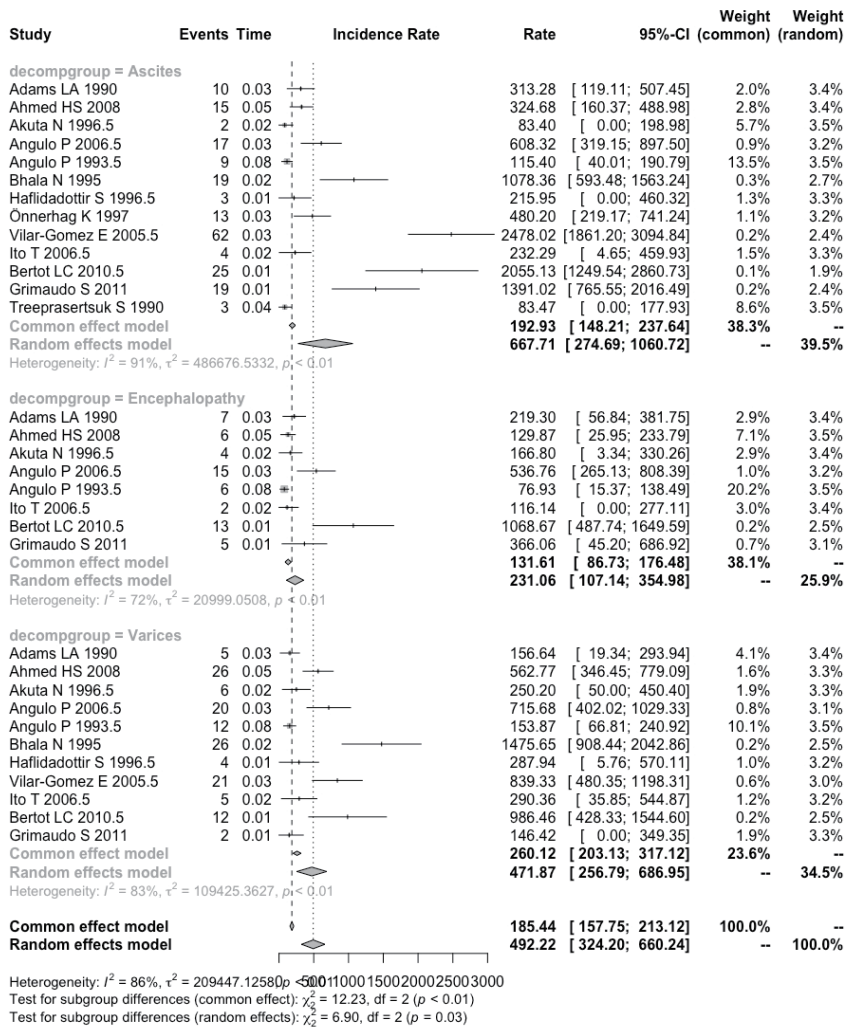

G Decompensation specific events

Supplementary Figure 2. Continued.

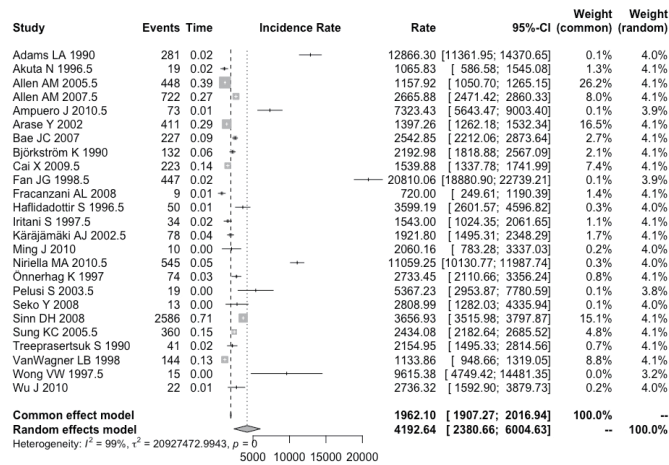

**H** Metabolic events overall

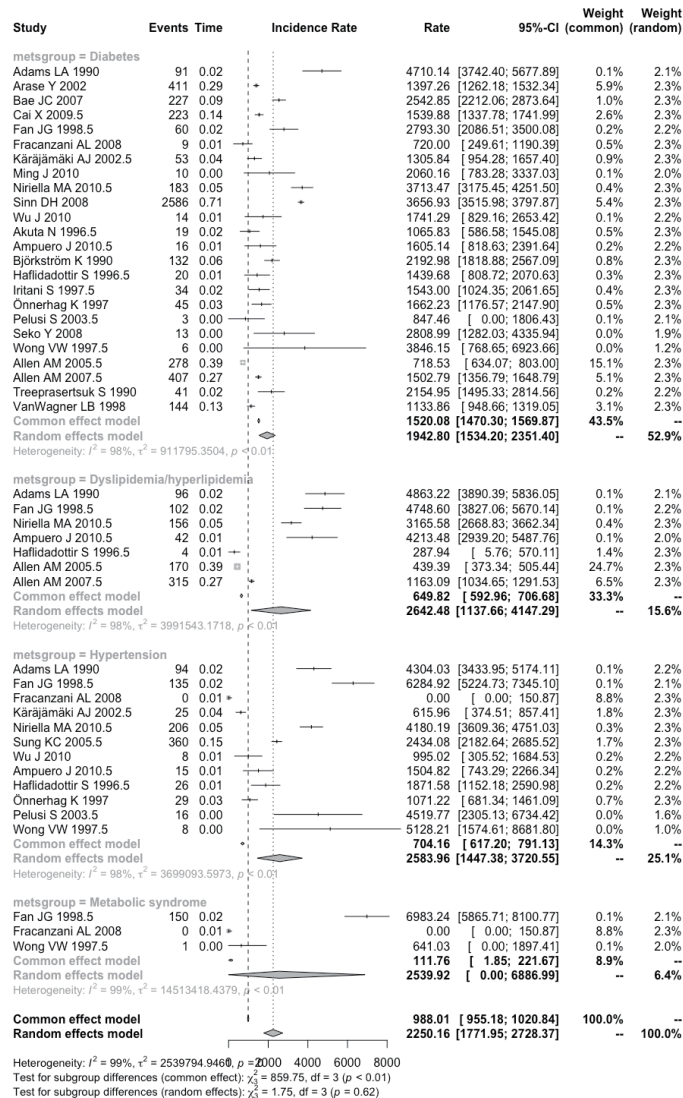

**I** Metabolic specific events

Supplementary Figure 2. Continued.

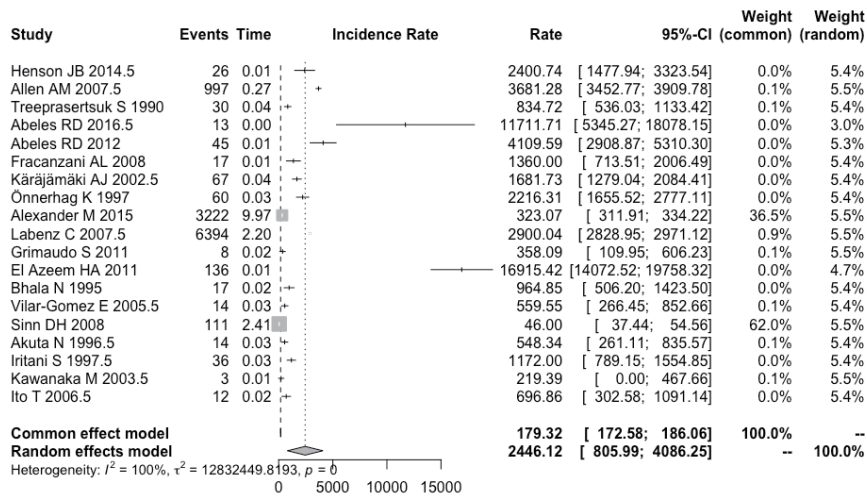

J CVD specific events

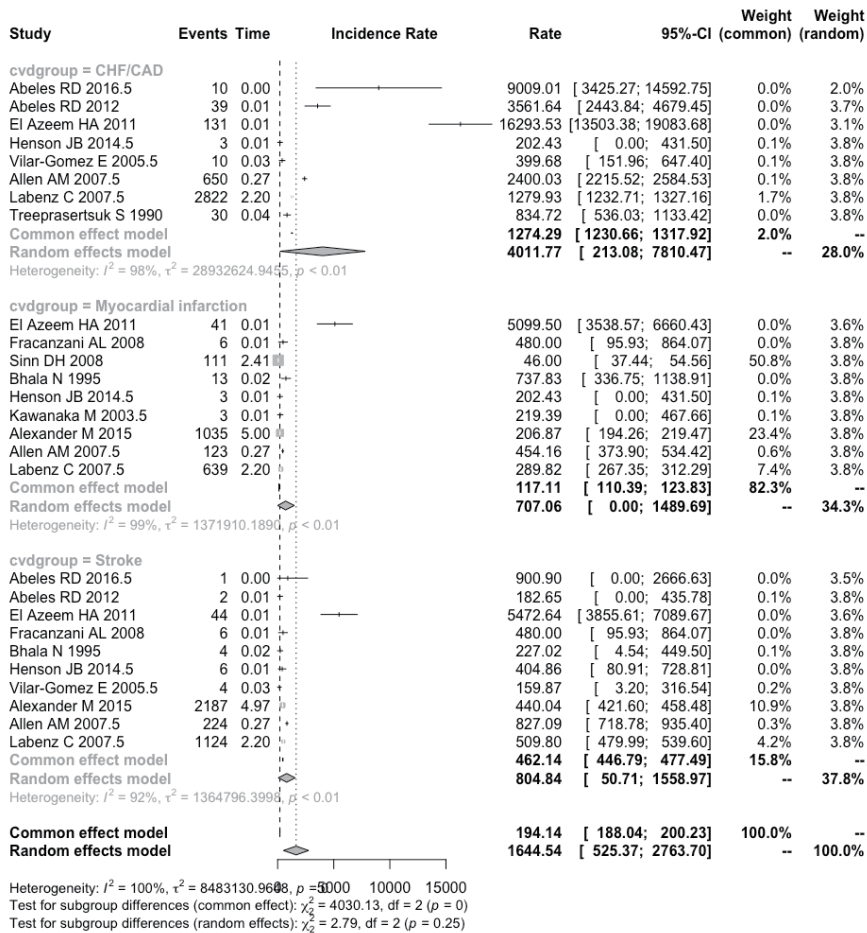

K CVD specific events

Supplementary Figure 2. Continued.

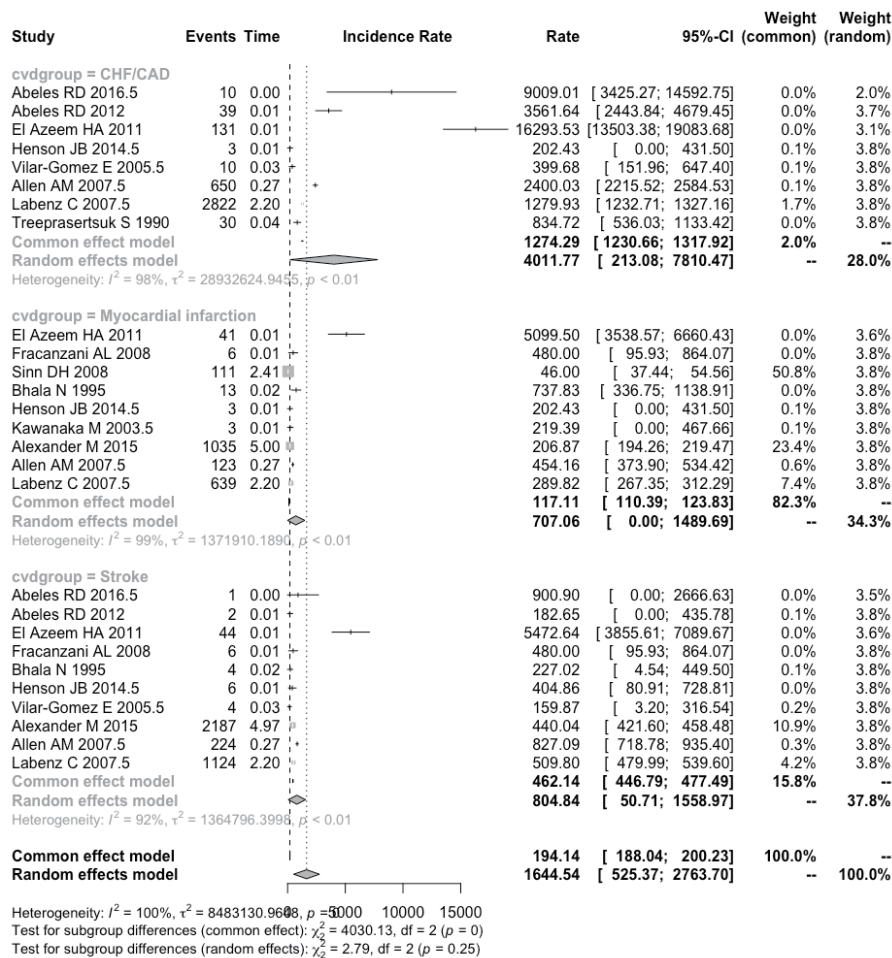

**K** CVD specific events

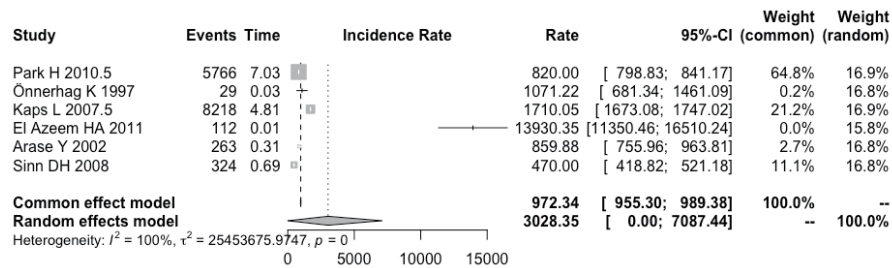

**L** Renal events

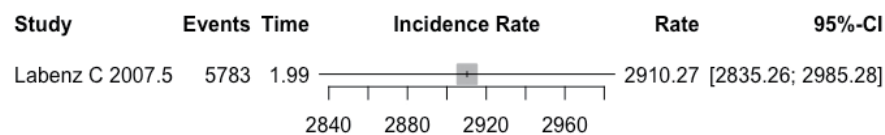

**M** Depression/anxiety events

Supplementary Figure 2. Continued.
